# Supplementary material for: Bacterial Lighthouses—Real-Time Detection of Yersinia enterocolitica by Quorum Sensing
Source: MDPI journal article supplement (doi:10.3390/bios11120517), 2021-12-16
Supplement: s1 [file s1]

Supplementary Materials

# Bacterial Lighthouses—Real-Time Detection of *Yersinia enterocolitica* by Quorum Sensing

Julia Niehues <sup>1</sup>, Christopher McElroy <sup>1</sup>, Alexander Croon <sup>1</sup>, Jan Pietschmann <sup>1</sup>, Martin Frettlöh <sup>2</sup> and Florian Schröper <sup>1,\*</sup>

- <sup>1</sup> Fraunhofer Institute for Molecular Biology and Applied Ecology IME, Forckenbeckstraße 6, 52074 Aachen, Germany; julia.niehues@ime.fraunhofer.de (J.N.); christopher.mcelroy@ime.fraunhofer.de (C.M.); alexander.croon@ime.fraunhofer.de (A.C.); jan.pietschmann@ime.fraunhofer.de (J.P.)  
<sup>2</sup> Quh-Lab Lebensmittelsicherheit, Siegener Str. 29, 57080 Siegen, Germany; martin.frettlöh@quh-lab.de  
 \* Correspondence: florian.schroeper@ime.fraunhofer.de; Tel.: +49-(0)241-6085-13012

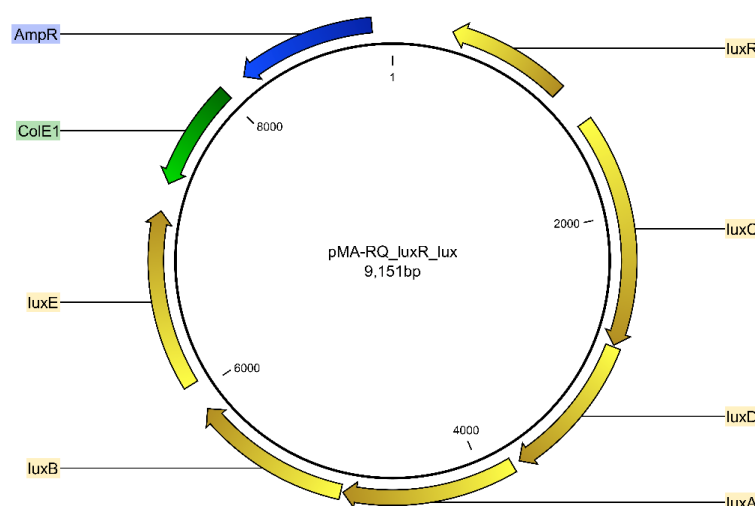

**Figure S1.** Plasmid map of sensor plasmid pMA-RQ\_luxR\_lux. It is based on the sequence of pSB401 [36], encoding a fusion construct combining the *Vibrio fischeri* luxRI' and *Photorhabdus luminescens* luxCDABE sequences. The fusion construct was synthesized and joined to the pMA-RQ backbone by GeneArt. The backbone carries an ampicillin-resistance gene and a ColE1 origin of replication.

**Table S1.** Optimized parameters for detection of *N*-hexanoyl- and *N*-(3-oxohexanoyl)-L-homoserine lactone using LC-MS/MS.

| ID                                             | Q1 [Da] | Q3 [Da] | Dwell Time [ms] | DP [V] | EP [V] | CEP [V] | CE [V] | CXP [V] |
|------------------------------------------------|---------|---------|-----------------|--------|--------|---------|--------|---------|
| <i>N</i> -hexanoyl-L-homoserine lactone        | 200.1   | 102.1   | 200             | 30.0   | 6.90   | 12.189  | 13.670 | 2.00    |
| <i>N</i> -hexanoyl-L-homoserine lactone        | 200.1   | 182.1   | 200             | 30.0   | 6.90   | 12.189  | 13.670 | 2.00    |
| <i>N</i> -(3-oxohexanoyl)-L-homoserine lactone | 214.1   | 102.1   | 200             | 26.8   | 9.18   | 12.796  | 12.300 | 5.39    |
| <i>N</i> -(3-oxohexanoyl)-L-homoserine lactone | 214.1   | 168.1   | 200             | 26.8   | 9.18   | 12.796  | 12.300 | 5.39    |
